# Supplementary material
Source: PubMed Central journal article supplement (PMC8756426)

Figure S1. Transfection with miR-15a inhibitor has no effect on miR-15a expression. Reverse transcription-quantitative PCR analysis was performed to detect the effect of transfection with miR-15a inhibitor and anti-mi-NC on miR-15a expression in LNCAP cells. miR, microRNA; NC, negative control.

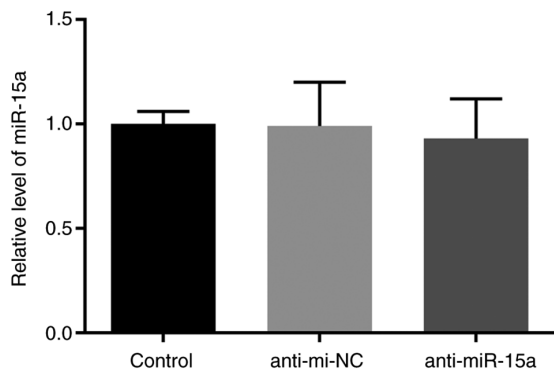

Supplement: Supplementary_Data.pdf [file Supplementary_Data.pdf]
